# Supplementary material for: Interpreting wide-band neural activity using convolutional neural networks
Source: eLife. 2021 Aug 2;10:e66551. doi: 10.7554/eLife.66551 (PMC8328518; doi:10.7554/eLife.66551)
Supplement: Supplementary file 1. — Note that the first layers 1–8 share the weights over the channel dimension while layers 9–15 share the weights across the time dimension. Layers 9 to 15 depict the kernel sizes and strides for the tetrode recordings with 128 channels. For recordings with different number of channels we adjust the number of downsampling layers to match the dimension of layer 15. Order of dimensions: Time, Frequency, Channels. [file elife-66551-supp1.xlsx]

## Sheet: Sheet 1
Layer	Layer Type	Input Dimension	Kernel Size	Strides	Filters
1	2D - Convolution	(64, 26, 128)	(3,3)	(2,1)	64
2	2D - Convolution	(32, 26, 128)	(3,3)	(1,2)	64
3	2D - Convolution	(32, 13, 128)	(3,3)	(2,1)	64
4	2D - Convolution	(16, 13, 128)	(3,3)	(1,2)	64
5	2D - Convolution	(16, 7, 128)	(3,3)	(2,1)	64
6	2D - Convolution	(8, 7, 128)	(3,3)	(1,2)	64
7	2D - Convolution	(8, 4, 128)	(3,3)	(2,1)	64
8	2D - Convolution	(4, 4, 128)	(3,3)	(1,2)	64
9	2D - Convolution	(4, 2, 128)	(3,2)	(1,2)	64
10	2D - Convolution	(4, 2, 64)	(3,2)	(1,2)	128
11	2D - Convolution	(4, 2, 32)	(3,2)	(1,2)	128
12	2D - Convolution	(4, 2, 16)	(3,2)	(1,2)	128
13	2D - Convolution	(4, 2, 8)	(3,2)	(1,2)	128
14	2D - Convolution	(4, 2, 4)	(3,2)	(1,2)	128
15	2D - Convolution	(4, 2, 2)	(3,2)	(1,2)	128
16	Fully Connected	(4, 512)	-	-	1024
17	Fully Connected	(4, )	-	-	2/1
